# Supplementary material for: Assessing and optimizing the role of wind forcing and upper-ocean dynamics in marine pollution transport simulations using surface drifters in the Canary Current System
Source: Copernicus journal article supplement (doi:10.5194/egusphere-2024-3913), 2024-12-18
Supplement: Supplementary file [file egusphere-2024-3913-AC3-supplement.pdf]

Dear Dr. van Sebille,

Thank you for your email and for the opportunity to have our manuscript considered for publication in Ocean Science. We appreciate the time and effort that both you and the reviewers have invested in evaluating our work.

We have carefully reviewed the referee comments and acknowledge their critical assessment regarding the novelty and relevance of our study, among other comments. While we regret that our manuscript does not align with the scope and expectations of Ocean Science, we recognize the value of the feedback provided. We will take these comments into account as we refine our study for submission to a more suitable journal.

Once again, we appreciate the constructive critique and the editorial handling of our submission. We hope to have the opportunity to contribute to Ocean Science in the future.

Best regards,

Álvaro Cubas on behalf of all coauthors.
